# Supplementary material for: Gold nanoparticle modified magnetic fibrous silica microspheres as a highly efficient and recyclable catalyst for the reduction of 4-nitrophenol
Source: Royal Society of Chemistry journal article supplement (doi:10.1039/c5nj00713e), 2015-01-01
Supplement: c5nj00713e1.pdf [file c5nj00713e1.pdf]

**Gold nanoparticles modified magnetic fibrous silica microsphere  
as a highly efficient and recyclable catalyst for the reduction of 4-  
nitrophenol**

Zhengping Dong\*, Guiqin Yu, Xuanduong Le

*College of Chemistry and Chemical Engineering, Gansu Provincial Engineering Laboratory  
for Chemical Catalysis, Lanzhou University, Lanzhou 730000, PR China*

\* Corresponding authors. Tel.: +86 0931 8912577; fax: +86 0931 8912582.

Email addresses: [dongzhp@lzu.edu.cn](mailto:dongzhp@lzu.edu.cn) (Z.P. Dong).

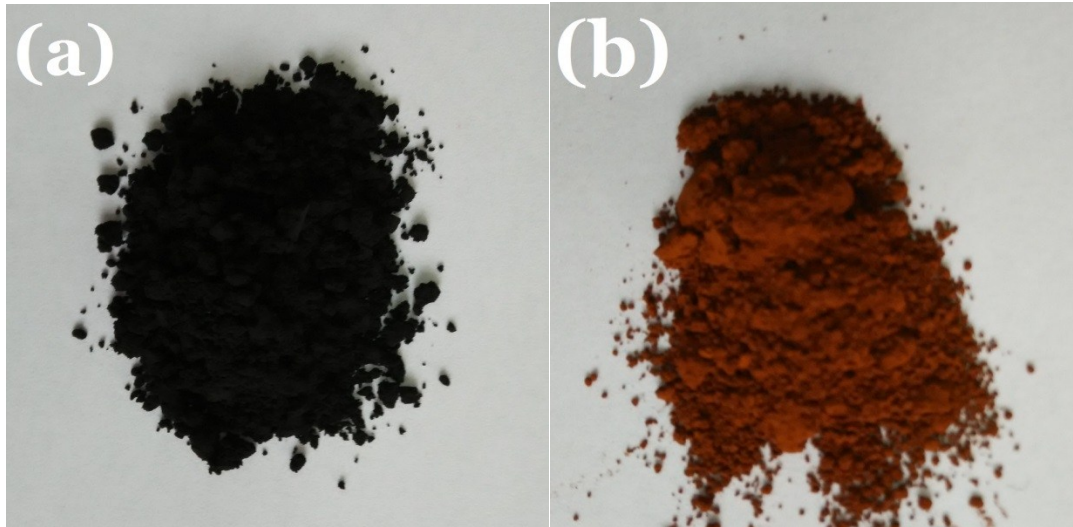

Fig. S1. Photographs of (a)  $\text{Fe}_3\text{O}_4@\text{SiO}_2$  (black), (b)  $\gamma\text{-Fe}_2\text{O}_3@\text{SiO}_2@\text{KCC-1}$  (brownness).

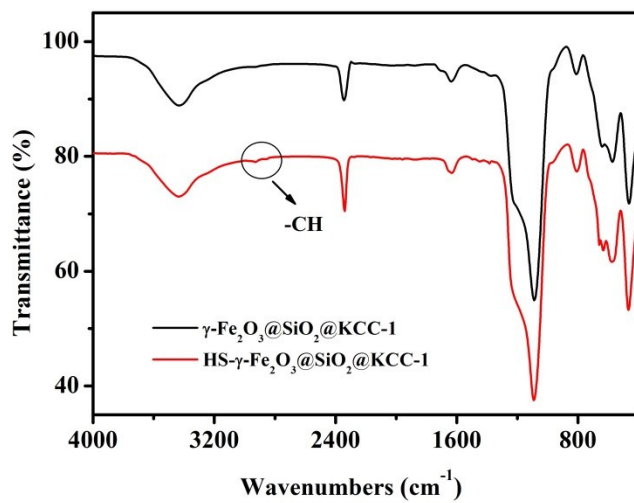

Fig. S2. FT-IR spectra of  $\gamma\text{-Fe}_2\text{O}_3@\text{SiO}_2@\text{KCC-1}$  and  $\text{HS-}\gamma\text{-Fe}_2\text{O}_3@\text{SiO}_2@\text{KCC-1}$ .

Table S1. Element contents of HS- $\gamma$ -Fe<sub>2</sub>O<sub>3</sub>@SiO<sub>2</sub>@KCC-1 and Au/ $\gamma$ -Fe<sub>2</sub>O<sub>3</sub>@SiO<sub>2</sub>@KCC-1.

| Sample                                                                | Element content (%) |      |      |      |
|-----------------------------------------------------------------------|---------------------|------|------|------|
|                                                                       | C                   | H    | S    | Au   |
| HS- $\gamma$ -Fe <sub>2</sub> O <sub>3</sub> @SiO <sub>2</sub> @KCC-1 | 2.08                | 0.61 | 1.82 |      |
| Au/ $\gamma$ -Fe <sub>2</sub> O <sub>3</sub> @SiO <sub>2</sub> @KCC-1 |                     |      |      | 4.63 |
